# Supplementary material for: Facile preparation of stable palygorskite/cationic red X-GRL@SiO2“Maya Red” pigments
Source: Royal Society of Chemistry journal article supplement (doi:10.1039/c4ra13739f), 2014-01-01
Supplement: c4ra13739f1.pdf [file c4ra13739f1.pdf]

Supporting information

## Facile preparation of stable palygorskite/cationic red X-GRL@SiO<sub>2</sub> “Maya Red” pigments

Ling Fan,<sup>a, b</sup> Yujie Zhang,<sup>a, b, c</sup> Junping Zhang,<sup>\*a, b</sup> and Aiqin Wang<sup>a, b</sup>

<sup>a</sup> Center of Eco-material and Green Chemistry, Lanzhou Institute of Chemical Physics, Chinese Academy of Sciences, Lanzhou, 730000, P. R. China.

<sup>b</sup> R&D Center of Xuyi Palygorskite Applied Technology, Lanzhou Institute of Chemical Physics, Chinese Academy of Science, Lanzhou 730000, China.

<sup>c</sup> Graduate University of the Chinese Academy of Sciences, 100049 Beijing, P. R. China.

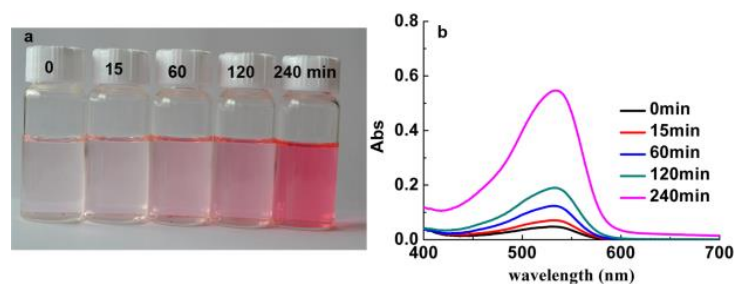

**Fig. S1.** Variation of (a) images and (b) UV-Vis spectra of the supernatants with milling time after attack of the PAL/CR-X-GRL pigments using ethanol for 24 h.

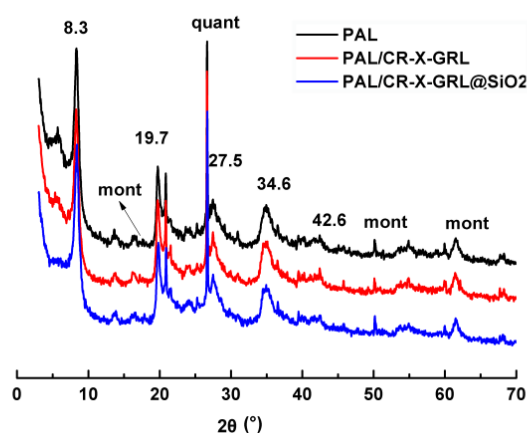

**Fig. S2.** XRD patterns of PAL, PAL/CR-X-GRL and PAL/CR-X-GRL@SiO<sub>2</sub>.
